# Supplementary material
Source: MDPI journal article supplement (https://www.mdpi.com/2073-4441/14/11/1823)
Supplement: s1 [file s1]

**Table S1.** Concentration of 16PAHs ( $\mu\text{g}\cdot\text{g}^{-1}$ ) in sediments from the Pearl River Estuary, 2011 [1]

| Site  | P19(HE)   | P1(HU)    | P33(JT)   | P43(JI)   | P38(HT)   | P37(YA)   | P17(HQ)   | P29(MD)   | P44       | P2        |
|-------|-----------|-----------|-----------|-----------|-----------|-----------|-----------|-----------|-----------|-----------|
| NAP   | 0.2404469 | 0.1176336 | 0.1547917 | 0.1548305 | 0.0671098 | 0.1354081 | 0.1039895 | 0.1237220 | 0.1079679 | 0.1826729 |
| ACY   | 0.0068605 | 0.0075011 | 0.0046675 | 0.0046148 | 0.0053991 | 0.0034136 | 0.0051367 | 0.0080678 | 0.0068089 | 0.0014561 |
| ACE   | 0.0087827 | 0.0074367 | 0.0089955 | 0.0087131 | 0.0043137 | 0.0051477 | 0.0040133 | 0.0082938 | 0.0085234 | 0.0026107 |
| FLU   | 0.0183965 | 0.0174040 | 0.0330347 | 0.0200171 | 0.0115389 | 0.0184853 | 0.0124656 | 0.0166817 | 0.0158381 | 0.0034211 |
| PHE   | 0.0838777 | 0.0569091 | 0.1071092 | 0.0691608 | 0.0534277 | 0.0556824 | 0.0526614 | 0.0633786 | 0.0719672 | 0.0134090 |
| ANT   | 0.0293880 | 0.0154654 | 0.0157896 | 0.0190307 | 0.0157007 | 0.0146640 | 0.0132324 | 0.0177414 | 0.0202622 | 0.0079522 |
| FLA   | 0.0752878 | 0.0450694 | 0.0374306 | 0.0425532 | 0.0437057 | 0.0332911 | 0.0378721 | 0.0553442 | 0.0459423 | 0.0075495 |
| PYR   | 0.0976265 | 0.0513981 | 0.0412171 | 0.0440383 | 0.0511363 | 0.0371115 | 0.0569833 | 0.0535433 | 0.0658157 | 0.0090823 |
| BaA   | 0.0195866 | 0.0101920 | 0.0087657 | 0.0094637 | 0.0152798 | 0.0103656 | 0.0137565 | 0.0109207 | 0.0115703 | 0.0000700 |
| CHR   | 0.0621359 | 0.0385093 | 0.0430721 | 0.0292284 | 0.0385481 | 0.0241120 | 0.0424175 | 0.0292884 | 0.0362718 | 0.0043582 |
| BbF   | 0.0395744 | 0.0311269 | 0.0288434 | 0.0311845 | 0.0338925 | 0.0260349 | 0.0331558 | 0.0314137 | 0.0221820 | 0.0047518 |
| BkF   | 0.0344431 | 0.0196333 | 0.0106067 | 0.0124715 | 0.0107077 | 0.0087616 | 0.0285709 | 0.0164816 | 0.0317307 | 0.0016720 |
| BaP   | 0.0575559 | 0.0335766 | 0.0281517 | 0.0240444 | 0.0295504 | 0.0178060 | 0.0287365 | 0.0279667 | 0.0263874 | 0.0062306 |
| IcdP  | 0.0584322 | 0.0337213 | 0.0193933 | 0.0160697 | 0.0227480 | 0.0173724 | 0.0241316 | 0.0283330 | 0.0265010 | 0.0029220 |
| BghiP | 0.0471462 | 0.0273839 | 0.0104624 | 0.0116170 | 0.0148895 | 0.0128448 | 0.0201188 | 0.0204033 | 0.0181971 | 0.0012667 |
| DahA  | 0.0179255 | 0.0124860 | 0.0087184 | 0.0087641 | 0.0103776 | 0.0083271 | 0.0077835 | 0.0105660 | 0.0109345 | 0.0033632 |
| TPAHs | 0.8974664 | 0.5254467 | 0.5610496 | 0.5058018 | 0.4283255 | 0.4288281 | 0.4850254 | 0.5221462 | 0.5269005 | 0.2527883 |

**Table S1.** Concentration of 16PAHs ( $\mu\text{g}\cdot\text{g}^{-1}$ ) in sediments from the Pearl River Estuary, 2011 (Cont.) [1]

| Site  | P3        | P26       | P30       | P34       | P39       | P40       | P5        | P12       | P14       | P9        |
|-------|-----------|-----------|-----------|-----------|-----------|-----------|-----------|-----------|-----------|-----------|
| NAP   | 0.0557717 | 0.1098188 | 0.1294811 | 0.0580793 | 0.0578186 | 0.0842172 | 0.0623096 | 0.1273504 | 0.1022090 | 0.1630559 |
| ACY   | 0.0032467 | 0.0048650 | 0.0014847 | 0.0043782 | 0.0025214 | 0.0044714 | 0.0039101 | 0.0036322 | 0.0018630 | 0.0021178 |
| ACE   | 0.0024395 | 0.0068033 | 0.0032340 | 0.0061180 | 0.0053591 | 0.0077455 | 0.0054334 | 0.0053202 | 0.0032221 | 0.0042123 |
| FLU   | 0.0141373 | 0.0160382 | 0.0055650 | 0.0141775 | 0.0099430 | 0.0186800 | 0.0139069 | 0.0111282 | 0.0051492 | 0.0065892 |
| PHE   | 0.0446656 | 0.0485153 | 0.0179623 | 0.0563122 | 0.0284039 | 0.0665965 | 0.0428095 | 0.0385109 | 0.0202777 | 0.0223087 |
| ANT   | 0.0105418 | 0.0159369 | 0.0065154 | 0.0182018 | 0.0078982 | 0.0193056 | 0.0120300 | 0.0137076 | 0.0155767 | 0.0103320 |
| FLA   | 0.0244410 | 0.0410012 | 0.0087605 | 0.0494775 | 0.0205322 | 0.0459374 | 0.0345717 | 0.0292038 | 0.0169562 | 0.0154946 |
| PYR   | 0.0279110 | 0.0458114 | 0.0118286 | 0.0517312 | 0.0205275 | 0.0544916 | 0.0632940 | 0.0476159 | 0.0255908 | 0.0196895 |
| BaA   | 0.0055109 | 0.0070264 | 0.0020188 | 0.0087462 | 0.0031019 | 0.0057688 | 0.0077275 | 0.0098237 | 0.0036875 | 0.0000700 |
| CHR   | 0.0146915 | 0.0247436 | 0.0061147 | 0.0353377 | 0.0099252 | 0.0288692 | 0.0319110 | 0.0224035 | 0.0120968 | 0.0101726 |
| BbF   | 0.0153634 | 0.0212740 | 0.0061046 | 0.0190145 | 0.0101490 | 0.0210930 | 0.0147029 | 0.0267199 | 0.0108895 | 0.0065803 |
| BkF   | 0.0073482 | 0.0133527 | 0.0038374 | 0.0152678 | 0.0048341 | 0.0168089 | 0.0117496 | 0.0119875 | 0.0055913 | 0.0036638 |
| BaP   | 0.0114424 | 0.0201596 | 0.0037336 | 0.0225780 | 0.0058654 | 0.0216321 | 0.0160583 | 0.0188104 | 0.0064664 | 0.0047164 |
| IcdP  | 0.0081677 | 0.0174474 | 0.0036091 | 0.0189961 | 0.0054490 | 0.0206988 | 0.0146761 | 0.0176967 | 0.0071738 | 0.0046302 |
| BghiP | 0.0049323 | 0.0123289 | 0.0015266 | 0.0125876 | 0.0034168 | 0.0125351 | 0.0108534 | 0.0138629 | 0.0050857 | 0.0028546 |
| DahA  | 0.0048266 | 0.0069189 | 0.0038531 | 0.0084607 | 0.0045174 | 0.0085075 | 0.0082602 | 0.0084839 | 0.0054966 | 0.0041270 |
| TPAHs | 0.2554376 | 0.4120416 | 0.2156295 | 0.3994643 | 0.2002627 | 0.4373586 | 0.3542042 | 0.4062577 | 0.2473323 | 0.2806149 |

**Table S1.** Concentration of 16PAHs ( $\mu\text{g}\cdot\text{g}^{-1}$ ) in sediments from the Pearl River Estuary, 2011 (Cont.) [1]

| Site  | P11       | P27       | P36       | P41       | S1        | P2        | P4        | P6        | P7        | P8        |
|-------|-----------|-----------|-----------|-----------|-----------|-----------|-----------|-----------|-----------|-----------|
| NAP   | 0.1025028 | 0.2400972 | 0.0974921 | 0.0516912 | 0.0448860 | 0.0395324 | 0.1759340 | 0.0544307 | 0.0428834 | 0.1117111 |
| ACY   | 0.0032191 | 0.0483810 | 0.0042995 | 0.0021061 | 0.0012283 | 0.0015127 | 0.0022730 | 0.0013808 | 0.0015848 | 0.0018777 |
| ACE   | 0.0070317 | 0.0236219 | 0.0060929 | 0.0014177 | 0.0024921 | 0.0031361 | 0.0048146 | 0.0030355 | 0.0059905 | 0.0052601 |
| FLU   | 0.0139939 | 0.0607129 | 0.0183068 | 0.0083687 | 0.0058838 | 0.0066639 | 0.0102823 | 0.0039083 | 0.0080439 | 0.0088195 |
| PHE   | 0.0518019 | 0.1490140 | 0.0522233 | 0.0237878 | 0.0198792 | 0.0210865 | 0.0299353 | 0.0124800 | 0.0331948 | 0.0303144 |
| ANT   | 0.0125505 | 0.0605958 | 0.0273698 | 0.0086115 | 0.0087447 | 0.0080520 | 0.0078004 | 0.0062385 | 0.0111552 | 0.0067885 |
| FLA   | 0.0324755 | 0.0588805 | 0.0388814 | 0.0163940 | 0.0138100 | 0.0192905 | 0.0214031 | 0.0068069 | 0.0258528 | 0.0268806 |
| PYR   | 0.0443157 | 0.1360113 | 0.0391608 | 0.0186570 | 0.0135266 | 0.0173414 | 0.0241547 | 0.0093991 | 0.0222512 | 0.0248672 |
| BaA   | 0.0011961 | 0.0253455 | 0.0051330 | 0.0034244 | 0.0021234 | 0.0035482 | 0.0041202 | 0.0019747 | 0.0033335 | 0.0045210 |
| CHR   | 0.0242257 | 0.0409616 | 0.0205398 | 0.0083739 | 0.0071047 | 0.0100071 | 0.0123535 | 0.0036831 | 0.0128071 | 0.0126736 |
| BbF   | 0.0154435 | 0.0198442 | 0.0255090 | 0.0125581 | 0.0033768 | 0.0101614 | 0.0122206 | 0.0056932 | 0.0152135 | 0.0135706 |
| BkF   | 0.0101867 | 0.0152654 | 0.0142232 | 0.0040452 | 0.0008817 | 0.0059989 | 0.0062878 | 0.0026508 | 0.0082628 | 0.0067480 |
| BaP   | 0.0127873 | 0.0278266 | 0.0143454 | 0.0062459 | 0.0032055 | 0.0051991 | 0.0069331 | 0.0015539 | 0.0055190 | 0.0068702 |
| IcdP  | 0.0138568 | 0.0211209 | 0.0115764 | 0.0049330 | 0.0046971 | 0.0046828 | 0.0062014 | 0.0015645 | 0.0057659 | 0.0059865 |
| BghiP | 0.0083398 | 0.0084417 | 0.0079266 | 0.0029777 | 0.0031109 | 0.0031859 | 0.0050558 | 0.0015786 | 0.0035182 | 0.0047176 |
| DahA  | 0.0038708 | 0.0062014 | 0.0069345 | 0.0040960 | 0.0031989 | 0.0047187 | 0.0051255 | 0.0036128 | 0.0037267 | 0.0051206 |
| TPAHs | 0.3577978 | 0.9423219 | 0.3900145 | 0.1776882 | 0.1381497 | 0.1641176 | 0.3348953 | 0.1199914 | 0.2091033 | 0.2767272 |

**Table S1.** Concentration of 16PAHs ( $\mu\text{g}\cdot\text{g}^{-1}$ ) in sediments from the Pearl River Estuary, 2011 (Cont.) [1]

| Site  | P10       | P15       | P22       | P16       | P23       | P24       | P28       | P31       | P32       | S2        |
|-------|-----------|-----------|-----------|-----------|-----------|-----------|-----------|-----------|-----------|-----------|
| NAP   | 0.2703050 | 0.0547673 | 0.0441748 | 0.0905192 | 0.1904126 | 0.1059345 | 0.0474631 | 0.1858161 | 0.0578299 | 0.3629680 |
| ACY   | 0.0026617 | 0.0018501 | 0.0017222 | 0.0027422 | 0.0011845 | 0.0016409 | 0.0016116 | 0.0017565 | 0.0018379 | 0.0026576 |
| ACE   | 0.0061166 | 0.0065423 | 0.0039098 | 0.0083692 | 0.0034810 | 0.0050831 | 0.0033906 | 0.0051661 | 0.0080475 | 0.0069142 |
| FLU   | 0.0102147 | 0.0074564 | 0.0094852 | 0.0129583 | 0.0067186 | 0.0081231 | 0.0050424 | 0.0094026 | 0.0106820 | 0.0090597 |
| PHE   | 0.0297027 | 0.0245453 | 0.0431215 | 0.0433603 | 0.0283394 | 0.0258746 | 0.0193478 | 0.0234761 | 0.0476565 | 0.0296518 |
| ANT   | 0.0091438 | 0.0092548 | 0.0156006 | 0.0132374 | 0.0132295 | 0.0124359 | 0.0096765 | 0.0066337 | 0.0129182 | 0.0089544 |
| FLA   | 0.0314445 | 0.0191766 | 0.0273645 | 0.0329513 | 0.0166736 | 0.0250816 | 0.0129304 | 0.0171612 | 0.0272119 | 0.0210449 |
| PYR   | 0.0332082 | 0.0153969 | 0.0250324 | 0.0369975 | 0.0164209 | 0.0213084 | 0.0125569 | 0.0209247 | 0.0231298 | 0.0207396 |
| BaA   | 0.0030134 | 0.0021279 | 0.0031410 | 0.0031896 | 0.0019851 | 0.0038350 | 0.0014703 | 0.0025499 | 0.0029138 | 0.0011961 |
| CHR   | 0.0176076 | 0.0072624 | 0.0131765 | 0.0149705 | 0.0106161 | 0.0120032 | 0.0060240 | 0.0097822 | 0.0119760 | 0.0090301 |
| BbF   | 0.0094815 | 0.0097653 | 0.0128903 | 0.0158837 | 0.0083077 | 0.0132629 | 0.0056545 | 0.0059987 | 0.0197541 | 0.0037143 |
| BkF   | 0.0046144 | 0.0079484 | 0.0088118 | 0.0080658 | 0.0049448 | 0.0069608 | 0.0024689 | 0.0023744 | 0.0054973 | 0.0010632 |
| BaP   | 0.0057398 | 0.0041011 | 0.0065973 | 0.0060005 | 0.0041566 | 0.0067965 | 0.0026255 | 0.0030673 | 0.0045014 | 0.0031391 |
| IcdP  | 0.0069007 | 0.0047324 | 0.0081933 | 0.0070401 | 0.0052538 | 0.0067746 | 0.0040042 | 0.0037040 | 0.0063084 | 0.0040107 |
| BghiP | 0.0051074 | 0.0031146 | 0.0050152 | 0.0054118 | 0.0032157 | 0.0053396 | 0.0027344 | 0.0023173 | 0.0034122 | 0.0025160 |
| DahA  | 0.0052506 | 0.0044569 | 0.0060492 | 0.0052879 | 0.0038994 | 0.0051652 | 0.0034920 | 0.0035629 | 0.0045480 | 0.0040771 |
| TPAHs | 0.4505126 | 0.1824987 | 0.2342856 | 0.3069853 | 0.3188393 | 0.2656199 | 0.1404931 | 0.3036937 | 0.2482249 | 0.4907368 |

**Table S1.** Concentration of 16PAHs ( $\mu\text{g}\cdot\text{g}^{-1}$ ) in sediments from the Pearl River Estuary, 2011 (Cont.) [1]

| Site  | P42       | P35       | P13       | P25       | P21       | P20       | P18       | P45       | P3        | S6        |
|-------|-----------|-----------|-----------|-----------|-----------|-----------|-----------|-----------|-----------|-----------|
| NAP   | 0.1909857 | 0.1130908 | 0.1545726 | 0.0902340 | 0.2409466 | 0.0739536 | 0.1357676 | 0.1728514 | 0.1797633 | 0.0546209 |
| ACY   | 0.0017676 | 0.0032498 | 0.0021531 | 0.0027509 | 0.0015863 | 0.0018095 | 0.0020226 | 0.0059117 | 0.0060991 | 0.0029674 |
| ACE   | 0.0049869 | 0.0075409 | 0.0052722 | 0.0064717 | 0.0039093 | 0.0019578 | 0.0020042 | 0.0088333 | 0.0098120 | 0.0009541 |
| FLU   | 0.0062558 | 0.0156009 | 0.0076325 | 0.0142982 | 0.0085211 | 0.0082600 | 0.0085645 | 0.0219972 | 0.0209687 | 0.0060871 |
| PHE   | 0.0202873 | 0.0351380 | 0.0222614 | 0.0401497 | 0.0332672 | 0.0253043 | 0.0395501 | 0.0878316 | 0.0678882 | 0.0221126 |
| ANT   | 0.0093501 | 0.0070587 | 0.0096909 | 0.0152182 | 0.0134331 | 0.0100068 | 0.0117623 | 0.0239032 | 0.0243595 | 0.0072747 |
| FLA   | 0.0116399 | 0.0367052 | 0.0221679 | 0.0930036 | 0.0269181 | 0.0288399 | 0.0292615 | 0.0481964 | 0.0571688 | 0.0106044 |
| PYR   | 0.0114711 | 0.0313161 | 0.0195244 | 0.0404705 | 0.0237812 | 0.0293230 | 0.0312367 | 0.0686978 | 0.0862995 | 0.0156290 |
| BaA   | 0.0011961 | 0.0037137 | 0.0016780 | 0.0044162 | 0.0036190 | 0.0045627 | 0.0063972 | 0.0159071 | 0.0149289 | 0.0022227 |
| CHR   | 0.0058987 | 0.0165077 | 0.0101964 | 0.0174032 | 0.0136395 | 0.0146831 | 0.0151269 | 0.0405115 | 0.0434894 | 0.0059105 |
| BbF   | 0.0053227 | 0.0112589 | 0.0073715 | 0.0198224 | 0.0133216 | 0.0152942 | 0.0232020 | 0.0486527 | 0.0579164 | 0.0066589 |
| BkF   | 0.0020773 | 0.0126182 | 0.0049511 | 0.0142468 | 0.0089405 | 0.0071921 | 0.0121033 | 0.0158272 | 0.0219403 | 0.0030659 |
| BaP   | 0.0080669 | 0.0084107 | 0.0051637 | 0.0100590 | 0.0072061 | 0.0094450 | 0.0114871 | 0.0336682 | 0.0357409 | 0.0041385 |
| IcdP  | 0.0031595 | 0.0091224 | 0.0058106 | 0.0132551 | 0.0089431 | 0.0077670 | 0.0131362 | 0.0296109 | 0.0298247 | 0.0032741 |
| BghiP | 0.0021557 | 0.0059582 | 0.0036569 | 0.0104183 | 0.0065709 | 0.0057223 | 0.0120760 | 0.0230585 | 0.0247012 | 0.0015194 |
| DahA  | 0.0036077 | 0.0060945 | 0.0043320 | 0.0069756 | 0.0054395 | 0.0045167 | 0.0059399 | 0.0136459 | 0.0132508 | 0.0037735 |
| TPAHs | 0.2882290 | 0.3233847 | 0.2864352 | 0.3991934 | 0.4200431 | 0.2486380 | 0.3596381 | 0.6591046 | 0.6941517 | 0.1508137 |

**Table S1.** Concentration of 16PAHs ( $\mu\text{g}\cdot\text{g}^{-1}$ ) in sediments from the Pearl River Estuary, 2011 (Cont.) [1]

| Site  | S7        | S3        | S4        | S5        | D11       | D12       | D6        | D7        | D3        | D16       |
|-------|-----------|-----------|-----------|-----------|-----------|-----------|-----------|-----------|-----------|-----------|
| NAP   | 0.0717683 | 0.1390147 | 0.0909812 | 0.0425742 | 0.1506349 | 0.1553390 | 0.1248085 | 0.2263875 | 0.2421222 | 0.0530477 |
| ACY   | 0.0024546 | 0.0019646 | 0.0025142 | 0.0039748 | 0.0042826 | 0.0031573 | 0.0056009 | 0.0034711 | 0.0057854 | 0.0033258 |
| ACE   | 0.0022545 | 0.0052230 | 0.0049394 | 0.0010270 | 0.0058993 | 0.0048205 | 0.0097206 | 0.0048902 | 0.0100288 | 0.0047690 |
| FLU   | 0.0082974 | 0.0085822 | 0.0105607 | 0.0111263 | 0.0145055 | 0.0084615 | 0.0204476 | 0.0097975 | 0.0210164 | 0.0121227 |
| PHE   | 0.0248230 | 0.0234310 | 0.0447743 | 0.0425202 | 0.0546744 | 0.0278906 | 0.0811851 | 0.0290510 | 0.0602471 | 0.0489492 |
| ANT   | 0.0084331 | 0.0070096 | 0.0158968 | 0.0168642 | 0.0143583 | 0.0072698 | 0.0376198 | 0.0097634 | 0.0137794 | 0.0118519 |
| FLA   | 0.0168108 | 0.0126261 | 0.0228889 | 0.0300919 | 0.0369587 | 0.0218294 | 0.0353322 | 0.0330023 | 0.0336213 | 0.0365759 |
| PYR   | 0.0254834 | 0.0129606 | 0.0231312 | 0.0473591 | 0.0520234 | 0.0253249 | 0.0444069 | 0.0474841 | 0.0378081 | 0.0418768 |
| BaA   | 0.0046508 | 0.0021312 | 0.0018778 | 0.0102738 | 0.0069309 | 0.0014720 | 0.0052352 | 0.0037288 | 0.0064105 | 0.0042429 |
| CHR   | 0.0109384 | 0.0072251 | 0.0158287 | 0.0241793 | 0.0260188 | 0.0132371 | 0.0229935 | 0.0260024 | 0.0183418 | 0.0235495 |
| BbF   | 0.0123382 | 0.0067789 | 0.0083564 | 0.0183512 | 0.0165858 | 0.0087296 | 0.0168271 | 0.0125324 | 0.0165252 | 0.0197240 |
| BkF   | 0.0063436 | 0.0034117 | 0.0059702 | 0.0147862 | 0.0123239 | 0.0054702 | 0.0133087 | 0.0084763 | 0.0090347 | 0.0113711 |
| BaP   | 0.0082494 | 0.0036168 | 0.0072446 | 0.0140706 | 0.0163335 | 0.0078603 | 0.0178793 | 0.0131771 | 0.0136383 | 0.0150549 |
| IcdP  | 0.0065057 | 0.0033668 | 0.0075187 | 0.0124504 | 0.0108650 | 0.0075516 | 0.0173195 | 0.0115488 | 0.0106657 | 0.0121972 |
| BghiP | 0.0044736 | 0.0016900 | 0.0045861 | 0.0100119 | 0.0065207 | 0.0046450 | 0.0096135 | 0.0075062 | 0.0077105 | 0.0065067 |
| DahA  | 0.0047939 | 0.0035994 | 0.0055822 | 0.0061504 | 0.0060488 | 0.0050166 | 0.0082430 | 0.0065312 | 0.0063382 | 0.0070076 |
| TPAHs | 0.2186187 | 0.2426317 | 0.2726514 | 0.3058115 | 0.4349645 | 0.3080754 | 0.4705414 | 0.4533503 | 0.5130736 | 0.3121729 |

**Table S1.** Concentration of 16PAHs ( $\mu\text{g}\cdot\text{g}^{-1}$ ) in sediments from the Pearl River Estuary, 2011 (Cont.) [1]

| Site  | D13       | D8        | D2        | D4        | D9        | D5        | D17       | D1        | D14       | D15       | D10       |
|-------|-----------|-----------|-----------|-----------|-----------|-----------|-----------|-----------|-----------|-----------|-----------|
| NAP   | 0.1143548 | 0.1138874 | 0.0822712 | 0.0877067 | 0.0676289 | 0.1428445 | 0.0790840 | 0.0996119 | 0.0643719 | 0.0730967 | 0.0718520 |
| ACY   | 0.0035048 | 0.0018859 | 0.0026492 | 0.0050459 | 0.0093101 | 0.0020654 | 0.0045264 | 0.0054819 | 0.0031542 | 0.0011658 | 0.0135458 |
| ACE   | 0.0063932 | 0.0044484 | 0.0017243 | 0.0035967 | 0.0230730 | 0.0030448 | 0.0032640 | 0.0088422 | 0.0056074 | 0.0019685 | 0.0075551 |
| FLU   | 0.0161308 | 0.0074625 | 0.0089484 | 0.0173565 | 0.0230705 | 0.0085564 | 0.0162842 | 0.0204025 | 0.0119857 | 0.0043711 | 0.0197984 |
| PHE   | 0.0482248 | 0.0242087 | 0.0340484 | 0.0626133 | 0.1143977 | 0.0226111 | 0.0542979 | 0.0695793 | 0.0479095 | 0.0147835 | 0.0778605 |
| ANT   | 0.0290818 | 0.0090818 | 0.0156316 | 0.0161280 | 0.0352908 | 0.0083213 | 0.0149029 | 0.0170042 | 0.0157242 | 0.0062700 | 0.0285116 |
| FLA   | 0.0288911 | 0.0259671 | 0.0245914 | 0.0432964 | 0.2067697 | 0.0197200 | 0.0391208 | 0.0539940 | 0.0315707 | 0.0073616 | 0.0927721 |
| PYR   | 0.0277891 | 0.0222987 | 0.0288113 | 0.0511961 | 0.1814678 | 0.0220918 | 0.0476120 | 0.0628550 | 0.0322578 | 0.0113584 | 0.1080312 |
| BaA   | 0.0029718 | 0.0032941 | 0.0041860 | 0.0088131 | 0.0783832 | 0.0049121 | 0.0090512 | 0.0065865 | 0.0021385 | 0.0017815 | 0.0316193 |
| CHR   | 0.0142291 | 0.0122777 | 0.0143649 | 0.0274249 | 0.1105910 | 0.0125270 | 0.0234602 | 0.0354944 | 0.0223928 | 0.0051262 | 0.0725415 |
| BbF   | 0.0168562 | 0.0131301 | 0.0104530 | 0.0249440 | 0.0899773 | 0.0163653 | 0.0185138 | 0.0356347 | 0.0162303 | 0.0055197 | 0.0672139 |
| BkF   | 0.0101475 | 0.0078278 | 0.0076359 | 0.0139141 | 0.0797379 | 0.0055780 | 0.0167876 | 0.0286382 | 0.0086476 | 0.0018749 | 0.0378829 |
| BaP   | 0.0099950 | 0.0068547 | 0.0105241 | 0.0230593 | 0.0918003 | 0.0081096 | 0.0207598 | 0.0216691 | 0.0129461 | 0.0021986 | 0.0502951 |
| IcdP  | 0.0081626 | 0.0061657 | 0.0074286 | 0.0191213 | 0.0783951 | 0.0082263 | 0.0187722 | 0.0128576 | 0.0125833 | 0.0024006 | 0.0396575 |
| BghiP | 0.0053986 | 0.0041970 | 0.0046379 | 0.0124144 | 0.0739702 | 0.0062205 | 0.0126037 | 0.0066569 | 0.0068509 | 0.0010334 | 0.0359218 |
| DahA  | 0.0061352 | 0.0050514 | 0.0048762 | 0.0070085 | 0.0255602 | 0.0051364 | 0.0070200 | 0.0072958 | 0.0066144 | 0.0032906 | 0.0166810 |
| TPAHs | 0.3482664 | 0.2680390 | 0.2627824 | 0.4236392 | 1.2894237 | 0.2963305 | 0.3860607 | 0.4926042 | 0.3009853 | 0.1436011 | 0.7717397 |

**Table S2.** Concentration of 16PAHs ( $\mu\text{g}\cdot\text{g}^{-1}$ ) in sediments from the Pearl River Estuary, 2012 [2]

| Site  | A1      | A2      | A3      | A4      | A5      | A6      | A7      | A8      | A9      |
|-------|---------|---------|---------|---------|---------|---------|---------|---------|---------|
| NAP   | 0.1983  | 0.06823 | 0.07853 | 0.01651 | 0.0102  | 0.00852 | 0.00558 | 0.0082  | 0.07315 |
| ACY   | 0.04732 | 0.01519 | 0.03111 | 0.01426 | 0.01219 | 0.01002 | 0.00768 | 0.00746 | 0.01233 |
| ACE   | 0.07771 | 0.01258 | 0.02817 | 0.02472 | 0.01069 | 0.01278 | 0.00788 | 0.01007 | 0.00823 |
| FLU   | 0.35361 | 0.02929 | 0.13678 | 0.05247 | 0.01689 | 0.07766 | 0.01684 | 0.04609 | 0.01902 |
| PHE   | 0.30971 | 0.06191 | 0.14219 | 0.06158 | 0.08009 | 0.06886 | 0.04979 | 0.08211 | 0.03786 |
| ANT   | 0.0636  | 0.00868 | 0.01591 | 0.00862 | 0.01211 | 0.01077 | 0.0058  | 0.01005 | 0.00862 |
| FLA   | 0.38921 | 0.02095 | 0.03485 | 0.00889 | 0.0313  | 0.02924 | 0.03028 | 0.03208 | 0.02373 |
| PYR   | 0.4495  | 0.01945 | 0.04015 | 0.01234 | 0.04251 | 0.04237 | 0.01932 | 0.02872 | 0.02347 |
| BaA   | 0.26894 | 0.01409 | 0.03016 | 0.01417 | 0.02789 | 0.02789 | 0.02111 | 0.02016 | 0.02657 |
| CHR   | 0.33024 | 0.02056 | 0.03696 | 0.01357 | 0.03043 | 0.02771 | 0.02642 | 0.01985 | 0.02372 |
| BbF   | 0.37153 | 0.02344 | 0.04917 | 0.01569 | 0.06152 | 0.0292  | 0.02989 | 0.02811 | 0.02913 |
| BkF   | 0.09705 | 0.00678 | 0.04233 | 0.00786 | 0.01119 | 0.01299 | 0.0071  | 0.00871 | 0.0074  |
| BaP   | 0.29443 | 0.02551 | 0.03517 | 0.02357 | 0.03682 | 0.04692 | 0.01964 | 0.03106 | 0.0307  |
| IcdP  | 0.22023 | 0.01304 | 0.0312  | 0.00942 | 0.03746 | 0.01819 | 0.01918 | 0.01888 | 0.01588 |
| BghiP | 0.28969 | 0.01248 | 0.03069 | 0.009   | 0.0295  | 0.01746 | 0.01219 | 0.06018 | 0.01268 |
| DahA  | 0.06748 | 0.00637 | 0.01392 | 0.00724 | 0.0093  | 0.00812 | 0.0077  | 0.01316 | 0.00928 |
| TPAHs | 3.82855 | 0.35855 | 0.77729 | 0.29991 | 0.46009 | 0.4487  | 0.2864  | 0.42489 | 0.36177 |

**Table S2.** Concentration of 16PAHs ( $\mu\text{g}\cdot\text{g}^{-1}$ ) in sediments from the Pearl River Estuary, 2012 (Cont.) [2]

| Site  | A10     | A11     | A12     | A13     | A14     | A15     | A16     | A17     |
|-------|---------|---------|---------|---------|---------|---------|---------|---------|
| NAP   | 0.06854 | 0.02427 | 0.01437 | 0.00328 | 0.017   | 0.00882 | 0.0087  | 0.00306 |
| ACY   | 0.01221 | 0.00461 | 0.03216 | 0.00896 | 0.00662 | 0.00962 | 0.00367 | 0.00481 |
| ACE   | 0.0096  | 0.00491 | 0.01223 | 0.01117 | 0.01217 | 0.00805 | 0.00657 | 0.00833 |
| FLU   | 0.06344 | 0.01547 | 0.17611 | 0.0649  | 0.01814 | 0.01623 | 0.01891 | 0.01183 |
| PHE   | 0.10806 | 0.03288 | 0.11779 | 0.05376 | 0.06958 | 0.03136 | 0.02709 | 0.02829 |
| ANT   | 0.01276 | 0.00436 | 0.01027 | 0.00611 | 0.00903 | 0.0069  | 0.0027  | 0.00393 |
| FLA   | 0.03669 | 0.00476 | 0.02666 | 0.0254  | 0.0349  | 0.0248  | 0.0102  | 0.01244 |
| PYR   | 0.04858 | 0.00968 | 0.02784 | 0.02055 | 0.03125 | 0.02135 | 0.00714 | 0.00972 |
| BaA   | 0.01344 | 0.01058 | 0.01169 | 0.01222 | 0.01233 | 0.01605 | 0.0064  | 0.00554 |
| CHR   | 0.02517 | 0.01924 | 0.01488 | 0.01258 | 0.0216  | 0.0133  | 0.00676 | 0.00572 |
| BbF   | 0.02047 | 0.01925 | 0.01779 | 0.01583 | 0.02059 | 0.01236 | 0.00631 | 0.00836 |
| BkF   | 0.00832 | 0.00773 | 0.00654 | 0.00663 | 0.01064 | 0.00778 | 0.00482 | 0.00463 |
| BaP   | 0.02818 | 0.02297 | 0.02961 | 0.02538 | 0.02571 | 0.01505 | 0       | 0       |
| IcdP  | 0.01959 | 0.01245 | 0.01462 | 0.009   | 0.0151  | 0.00674 | 0.00432 | 0.00616 |
| BghiP | 0.01866 | 0.01294 | 0.01671 | 0.00802 | 0.01438 | 0.0083  | 0.0061  | 0.00666 |
| DahA  | 0.01337 | 0.00681 | 0.00835 | 0.00678 | 0.0079  | 0.01065 | 0.00638 | 0       |
| TPAHs | 0.50708 | 0.21291 | 0.53762 | 0.29057 | 0.32694 | 0.21736 | 0.12607 | 0.11948 |

**Table S3.** Degradation rates of PAHs

| PAHs  | Degradation rate (d <sup>-1</sup> ) | Data source                  |
|-------|-------------------------------------|------------------------------|
| NAP   | 2.00×10 <sup>-2</sup>               | Agarry et al., 2015 [3]      |
| ACY   | 1.20×10 <sup>-2</sup>               | Rogers et al., 2002 [4]      |
| ACE   | 5.20×10 <sup>-3</sup>               | Rogers et al., 2002 [4]      |
| FLU   | 4.00×10 <sup>-4</sup>               | Thiele-Bruhn et al., 2005[5] |
| PHE   | 1.38×10 <sup>-1</sup>               | Baltrons et al., 2018 [6]    |
| ANT   | 1.20×10 <sup>-2</sup>               | Rogers et al., 2002 [4]      |
| FLA   | 1.20×10 <sup>-1</sup>               | Baltrons et al., 2018 [6]    |
| PYR   | 1.50×10 <sup>-1</sup>               | Rogers et al., 2002 [4]      |
| BaA   | 8.87×10 <sup>-3</sup>               | Rogers et al., 2002 [4]      |
| CHR   | 1.00×10 <sup>-4</sup>               | Thiele-Bruhn et al., 2005    |
| BbF   | 5.40×10 <sup>-3</sup>               | Baltrons et al., 2018 [6]    |
| BkF   | 1.00×10 <sup>-4</sup>               | Thiele-Bruhn et al., 2005[5] |
| BaP   | 2.80×10 <sup>-2</sup>               | Rogers et al., 2002 [4]      |
| IcdP  | 3.00×10 <sup>-3</sup>               | Rogers et al., 2002 [4]      |
| DahA  | 1.10×10 <sup>-3</sup>               | Wild et al., 1991 [7]        |
| BghiP | 4.81×10 <sup>-5</sup>               | Rogers et al., 2002 [4]      |

**Table S4.** Correlations between modelling results and monitoring data in 2011 based on the original PMF model

| PAHs  | Intercept | Slope | r <sup>2</sup> |
|-------|-----------|-------|----------------|
| NAP   | 0.045     | 0.57  | 0.41           |
| ACY   | 0.002     | 0.26  | 0.61           |
| ACE   | 0.002     | 0.51  | 0.64           |
| FLU   | 0.001     | 0.91  | 0.83           |
| PHE   | 0.001     | 0.99  | 0.83           |
| ANT   | 0.003     | 0.71  | 0.78           |
| FLA   | 0.011     | 0.72  | 0.64           |
| PYR   | 0.001     | 0.81  | 0.92           |
| BaA   | 0.003     | 0.43  | 0.74           |
| CHR   | 0.001     | 0.94  | 0.94           |
| BbF   | 0.001     | 0.86  | 0.84           |
| BkF   | 0.001     | 0.88  | 0.88           |
| BaP   | 0.001     | 0.92  | 0.98           |
| IcdP  | 0.001     | 0.93  | 0.97           |
| DahA  | 0.000     | 1.06  | 0.97           |
| BghiP | 0.001     | 0.80  | 0.92           |

**Table S5.** Correlations between modelling results and monitoring data in 2012 based on the original PMF model

| PAHs  | Intercept | Slope | r <sup>2</sup> |
|-------|-----------|-------|----------------|
| NAP   | 0.000     | 0.99  | 0.99           |
| ACY   | 0.003     | 0.58  | 0.70           |
| ACE   | 0.002     | 0.69  | 0.58           |
| FLU   | 0.013     | 0.50  | 0.78           |
| PHE   | 0.004     | 0.89  | 0.87           |
| ANT   | -0.001    | 1.06  | 0.90           |
| FLA   | 0.003     | 0.77  | 0.60           |
| PYR   | 0.005     | 0.72  | 0.74           |
| BaA   | 0.002     | 0.81  | 0.76           |
| CHR   | -0.001    | 1.01  | 0.88           |
| BbF   | 0.006     | 0.66  | 0.82           |
| BkF   | 0.005     | 0.34  | 0.62           |
| BaP   | 0.002     | 0.77  | 0.60           |
| IcdP  | 0.004     | 0.69  | 0.83           |
| DahA  | 0.001     | 0.77  | 0.84           |
| BghiP | 0.009     | 0.29  | 0.37           |

**Table S6.** Correlations between modelling results and monitoring data in 2011 based on the advanced PMF model

| <b>PAHs</b> | <b>Intercept</b> | <b>Slope</b> | <b>r<sup>2</sup></b> |
|-------------|------------------|--------------|----------------------|
| NAP         | 0.327            | 0.57         | 0.41                 |
| ACY         | 0.011            | 0.26         | 0.61                 |
| ACE         | 0.005            | 0.51         | 0.64                 |
| FLU         | 0.001            | 0.91         | 0.83                 |
| PHE         | 0.028            | 0.99         | 0.83                 |
| ANT         | 0.015            | 0.71         | 0.78                 |
| FLA         | 0.467            | 0.71         | 0.64                 |
| PYR         | 0.277            | 0.81         | 0.92                 |
| BaA         | 0.011            | 0.43         | 0.74                 |
| CHR         | 0.001            | 0.94         | 0.94                 |
| BbF         | 0.002            | 0.86         | 0.84                 |
| BkF         | 0.001            | 0.88         | 0.88                 |
| BaP         | 0.010            | 0.92         | 0.98                 |
| IcdP        | 0.001            | 0.93         | 0.97                 |
| DahA        | 0.000            | 1.07         | 0.97                 |
| BghiP       | 0.002            | 0.80         | 0.92                 |

**Table S7.** Correlations between modelling results and monitoring data in 2012 based on the advanced PMF model

| <b>PAHs</b> | <b>Intercept</b> | <b>Slope</b> | <b>r<sup>2</sup></b> |
|-------------|------------------|--------------|----------------------|
| NAP         | 0.017            | 0.79         | 0.86                 |
| ACY         | 0.190            | 0.44         | 0.52                 |
| ACE         | 0.095            | 0.51         | 0.39                 |
| FLU         | 0.017            | 0.28         | 0.45                 |
| PHE         | 0.405            | 0.79         | 0.81                 |
| ANT         | -0.001           | 1.01         | 0.89                 |
| FLA         | 0.111            | 0.80         | 0.64                 |
| PYR         | 0.341            | 0.66         | 0.74                 |
| BaA         | 0.007            | 0.81         | 0.80                 |
| CHR         | 0.000            | 0.81         | 0.89                 |
| BbF         | 0.016            | 0.63         | 0.81                 |
| BkF         | 0.005            | 0.35         | 0.66                 |
| BaP         | 0.007            | 0.91         | 0.72                 |
| IcdP        | 0.067            | 0.65         | 0.79                 |
| DahA        | 0.001            | 0.76         | 0.51                 |
| BghiP       | 0.011            | 0.27         | 0.34                 |

## References

1. Yuan, K.; Wang, X.; Lin, L.; Zou, S.; Li, Y.; Yang, Q.; Luan, T. Characterizing the parent and alkyl polycyclic aromatic hydrocarbons in the Pearl River Estuary, Daya Bay and northern South China Sea: Influence of riverine input. *Environ Pollut.* **2015**, *199*, 66–72.
2. Zhang, J.; Wang, Y.; Cheng, H.; Jiang, Z.; Sun, C.; Wu, M. Distribution and sources of the polycyclic aromatic hydrocarbons in the sediments of the Pearl River estuary, China. *Ecotoxicology* **2015**, *24*, 1643–1649.
3. Agarry, S.; Oghenejoboh, K.M. Enhanced aerobic biodegradation of naphthalene in soil: Kinetic modelling and half-life study. *Int. J. Environ. Bioremediation Biodegrad.* **2015**, *3*, 48–53.
4. Rogers, S.W.; Ong, S.K.; Kjartanson, B.H.; Golchin, J.; Stenback, G.A. Natural attenuation of polycyclic aromatic hydrocarbon-contaminated sites: Review. *Pract. Period. Hazard. Toxic Radioact. Waste Manag.* **2002**, *6*, 141–155.
5. Thiele-Bruhn, S.; Brümmer, G.W. Kinetics of polycyclic aromatic hydrocarbon (PAH) degradation in long-term polluted soils during bioremediation. *Plant Soil.* **2005**, *275*, 31–42.
6. Baltrons, O.; López-Mesas, M.; Vilaseca, M.; Gutiérrez-Bouzán, C.; Le Derf, F.; Portet-Koltalo, F.; Palet, C. Influence of a mixture of metals on PAHs biodegradation processes in soils. *Sci. Total Environ.* **2018**, *628-629*, 150-158.
7. Wild, S.R.; Berrow, M.L.; Jones, K.C. The persistence of polynuclear aromatic hydrocarbons (PAHs) in sewage sludge amended agricultural soils. *Environ. Pollut.* **1991**, *72*, 141-157.
